# Supplementary material
Source: Hindawi journal article supplement (doi:10.1155/2012/504905)
Supplement: f1 [file 504905.f1.pdf]

### The IDs of proteins used in Figure 1:

ACIAD1205-A. sp. ADP1 (CAG68082); AAH-M. *arborescens* (AAV65949);  
all1173-N. sp. PCC7120 (BAB73130); BL0618-B. *longum* (NP\_695805); BR2149-B.  
*suis* (AAN31039); CE2833-C. *efficiens* (BAC19643); Cgl2999-C. *glutamicum*  
(BAC00393); CJE1705-C. *jejuni* (YP\_179683); DIP2303-C. *diphtheriae*  
(CAE50826); Dpl-1-B. *anthracis* (AAP28955); Dpl-2-B. *anthracis* (AAP25903); Dpr-  
*S. mutans* (BAA96472); DpsA-S. *elongatus* (YP\_401188); Dps-A. *tumefaciens*  
(NP\_533149); Dps-B. *brevis* (1N1QA); Dps-B. *fragilis* (BAD48082); Dps-C. *feundii*  
(AAO47739); Dps-E. *cloacae* (AAO41729); Dps-E. *coli* (NP\_415333); Dps-K.  
*cryocrescens* (AAO41728); Dps-K. *pneumoniae* (AAO41730); Dps-P. *vulgaris*  
(AAO47740); Dps-S. *aureus* (NP\_372663); Dps-S. *marcescens* (AAO47741); Dps-S.  
*flexneri* (AAN42397); Dps- M. *smegmatis* (AAL40885); DpsA-S. *elongatus*  
(AAA86318); ECA2767-E. *carotovora* (CAG75667); Flp-L. *innocua* (P80725); FtpA-  
*H. ducreyi* (AAP95079); IL0075-I. *loihensis* (AAV80918); GOX0707-G. *oxydans*  
(AAW60484); Lxx08790-L. *xyli* (YP\_061879); MAP3560-M. *avium* (AAS06110);  
MrgA-B. *subtilis* (NP\_391178); MS0670-M. *succiniciproducens* (AAU37277);  
NapA-H. *pylori* (AAD07308); nfa13000-N. *farcinica* (YP\_117509); nfa43820- N.  
*farcinica* (YP\_120595); PPA2134-P. *acnes* (AAT83841); RB4433-R. *baltica*  
(CAD73784); SAV1605-S. *avermilis* (BAC69316); SAV2504-S. *avermilis*  
(BAC70215); SCO0596-S. *coelicolor* (CAB61290); STH866-S. *thermophilum*  
(YP\_074695); STM0831-S. *typhimurium* (NP\_459808); TpF1-T. *pallidum* (P16665);  
TW375-T. *whipplei* (NP\_789308); y1677-Y. *pestis* (NP\_668995); Ferritin-E. *coli*  
(AAC74975)

# FIGURE S1. The GC profiles of the *aah* gene.

A, the GC distribution on the whole cotig. The location of the *aah* gene is indicated by a black arrow. B, the GC content of the whole *aah* coding region. The gene is diagrammed as a hollow arrow. C, Plots of GC content at different base positions of the codons. Solid curve is GC3; broken curve is GC1; dotted curve is GC2. The broken straight line is the average GC content of the ORF with value shown on the y axis.

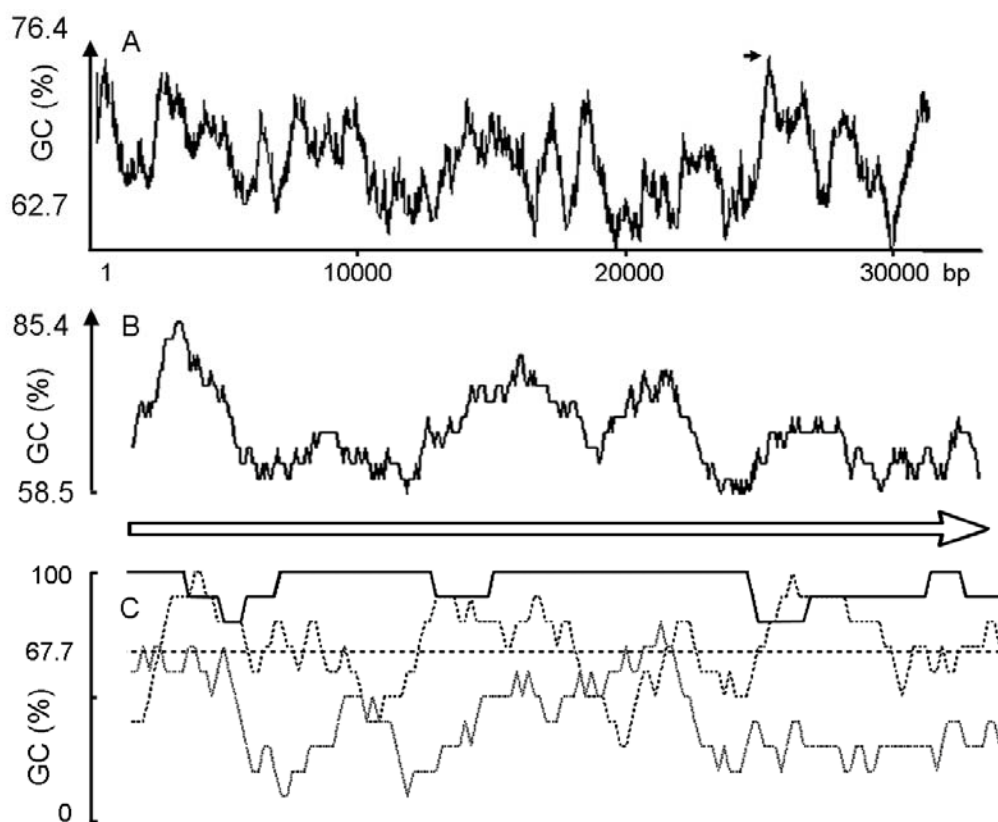

**TABLE S1. The stop codon usage and genome GC content in some bacteria.**

| Species <sup>a</sup>                          | GC             | ORF     | Stop codon usage (%) <sup>b</sup> |       |       |
|-----------------------------------------------|----------------|---------|-----------------------------------|-------|-------|
|                                               | content<br>(%) | counted | TAA                               | TAG   | TGA   |
| <i>Mycoplasma mobile</i> 163K                 | 25.0           | 635     | 84.25                             | 15.75 | 0     |
| <i>Rickettsia typhi</i> wilmington            | 28.9           | 835     | 64.79                             | 17.60 | 17.60 |
| <i>Campylobacter jejuni</i> RM1221            | 31.0           | 1840    | 64.46                             | 9.84  | 25.71 |
| <i>Methanococcus maripaludis</i> S2           | 33.1           | 1714    | 85.06                             | 7.58  | 7.35  |
| <i>Bacillus anthracis</i> Ames                | 35.0           | 5365    | 68.33                             | 16.01 | 15.66 |
| <i>Staphylococcus aureus</i> MW2              | 37.0           | 2632    | 73.44                             | 15.35 | 11.21 |
| <i>Haemophilus ducreyi</i> 35000HP            | 38.2           | 1717    | 74.02                             | 16.48 | 9.49  |
| <i>Streptococcus pneumoniae</i> R6            | 40.0           | 2043    | 59.72                             | 23.20 | 17.08 |
| <i>Bacillus subtilis</i> 168                  | 42.0           | 4098    | 62.05                             | 14.42 | 23.52 |
| <i>Lactobacillus plantarum</i> WCFS1          | 44.5           | 3009    | 57.76                             | 25.06 | 17.18 |
| <i>Vibrio vulnificus</i> YJ016                | 45.0           | 3261    | 62.43                             | 19.38 | 18.18 |
| <b><i>Tropheryma whippelii</i> TW08/27</b>    | 46.3           | 780     | 31.79                             | 34.23 | 33.97 |
| <i>Synechocystis</i> sp. PCC6803              | 47.0           | 3163    | 43.82                             | 36.36 | 19.82 |
| <i>Escherichia coli</i> K12-MG1655            | 50.0           | 4285    | 63.08                             | 7.61  | 29.31 |
| <i>Salmonella enterica</i> serovar Typhi CT18 | 52.0           | 4387    | 59.04                             | 9.78  | 31.18 |
| <i>Corynebacterium glutamicum</i> ATCC 13032  | 53.8           | 3057    | 53.32                             | 30.06 | 16.62 |
| <i>Synechococcus elongatus</i> PCC 7942       | 55.4           | 2611    | 32.82                             | 39.64 | 27.54 |
| <i>Chlorobium tepidum</i> TLS                 | 56.0           | 2254    | 33.72                             | 9.01  | 57.28 |
| <i>Agrobacterium tumefaciens</i> str. C58     | 59.0           | 2785    | 26.25                             | 11.45 | 62.30 |
| <i>Desulfovibrio desulfuricans</i> G20        | 60.0           | 3775    | 30.86                             | 24.08 | 45.06 |
| <i>Bifidobacterium longum</i> NCC2705         | 60.0           | 1729    | 23.71                             | 19.84 | 56.45 |
| <i>Thiobacillus denitrificans</i> ATCC 25259  | 63.0           | 2827    | 17.97                             | 16.63 | 65.41 |
| <i>Corynebacterium efficiens</i> YS-314       | 63.1           | 2950    | 25.8                              | 36.68 | 37.53 |
| <i>Azoarcus</i> sp. EbN1                      | 65.1           | 4115    | 13.68                             | 12.95 | 73.37 |
| <i>Halobacterium</i> sp. NRC-1                | 65.9           | 2058    | 20.46                             | 29.2  | 50.34 |
| <i>Pseudomonas aeruginosa</i> PAO1            | 67.0           | 5565    | 9.45                              | 11.48 | 79.07 |
| <b><i>Leifsonia xyli</i> CTCB07</b>           | 67.7           | 2030    | 10.1                              | 21.48 | 68.42 |
| <b><i>M. arborescens</i> SE14 - 10D5</b>      | 69.3           | 27      | 3.70                              | 7.41  | 88.89 |
| <i>Thermus thermophilus</i> HB27              | 69.4           | 1982    | 19.48                             | 37.74 | 42.79 |
| <i>Nocardia farcinica</i> IFM 10152           | 70.7           | 5722    | 3.43                              | 14.59 | 81.98 |
| <i>Streptomyces coelicolor</i> A3(2)          | 72.1           | 7493    | 4.46                              | 17.52 | 78.02 |

<sup>a</sup>. All data are the result of analyzing the whole genome, except *M. arborescens* SE14. All non-chromosome sequences such as plasmids had been omitted even if they had been deposited. Bold words are for highlighting purposes.

<sup>b</sup>. In *Mycoplasma* species, “TGA” is used to encode tryptophan instead of stop signal,  
*e.g* there are 1756 “TGA” coding Tryptophan in the genome in *Mycoplasma mobile*  
163K.
